# Supplementary material for: Real-time high-throughput characterisation of the surface elasticity of suspended cells
Source: Royal Society of Chemistry journal article supplement (doi:10.1039/d5lc00909j), 2026-01-01
Supplement: d5lc00909j1.pdf [file d5lc00909j1.pdf]

**Supplementary Information for**  
**Real-time high-throughput characterisation of the surface elasticity**  
**of suspended cells**

Ziyu Guo, Yi Sui\* and Wen Wang

*School of Engineering and Materials Science, Queen Mary University of London,  
London E1 4NS London, UK*

\* Corresponding author: [y.sui@qmul.ac.uk](mailto:y.sui@qmul.ac.uk)

(a)

| Row \ Column | 1                                                                   | 2                                                                   | 3                                                                    |
|--------------|---------------------------------------------------------------------|---------------------------------------------------------------------|----------------------------------------------------------------------|
| 1            | $\beta = 0.83, Ca = 0.45,$<br>$G_s = 5.3, K_s = 111.1 \text{ mN/m}$ | $\beta = 0.82, Ca = 0.25,$<br>$G_s = 9.5, K_s = 199.9 \text{ mN/m}$ | $\beta = 0.81, Ca = 0.15,$<br>$G_s = 15.9, K_s = 333.2 \text{ mN/m}$ |
| 2            | $\beta = 0.72, Ca = 0.55,$<br>$G_s = 4.3, K_s = 90.9 \text{ mN/m}$  | $\beta = 0.77, Ca = 0.30,$<br>$G_s = 7.9, K_s = 166.6 \text{ mN/m}$ | $\beta = 0.73, Ca = 0.1,$<br>$G_s = 23.8, K_s = 499.8 \text{ mN/m}$  |
| 3            | $\beta = 0.65, Ca = 0.45,$<br>$G_s = 5.3, K_s = 111.1 \text{ mN/m}$ | $\beta = 0.64, Ca = 0.2,$<br>$G_s = 11.9, K_s = 249.9 \text{ mN/m}$ | $\beta = 0.62, Ca = 0.1,$<br>$G_s = 23.8, K_s = 499.8 \text{ mN/m}$  |
| 4            | $\beta = 0.55, Ca = 0.55,$<br>$G_s = 4.3, K_s = 90.9 \text{ mN/m}$  | $\beta = 0.53, Ca = 0.30,$<br>$G_s = 7.9, K_s = 166.6 \text{ mN/m}$ | $\beta = 0.5, Ca = 0.05,$<br>$G_s = 47.6, K_s = 999.6 \text{ mN/m}$  |
| 5            | $\beta = 0.47, Ca = 0.65,$<br>$G_s = 3.7, K_s = 76.9 \text{ mN/m}$  | $\beta = 0.44, Ca = 0.30,$<br>$G_s = 7.9, K_s = 166.6 \text{ mN/m}$ | $\beta = 0.45, Ca = 0.05,$<br>$G_s = 47.6, K_s = 999.6 \text{ mN/m}$ |

(b)

| Row \ Column | 1                                                                  | 2                                                                   | 3                                                                    |
|--------------|--------------------------------------------------------------------|---------------------------------------------------------------------|----------------------------------------------------------------------|
| 1            | $\beta = 0.81, Ca = 0.50,$<br>$G_s = 2.0, K_s = 41.2 \text{ mN/m}$ | $\beta = 0.85, Ca = 0.30,$<br>$G_s = 3.3, K_s = 68.6 \text{ mN/m}$  | $\beta = 0.81, Ca = 0.10,$<br>$G_s = 9.8, K_s = 205.8 \text{ mN/m}$  |
| 2            | $\beta = 0.7, Ca = 0.65,$<br>$G_s = 1.5, K_s = 31.7 \text{ mN/m}$  | $\beta = 0.75, Ca = 0.40,$<br>$G_s = 2.5, K_s = 51.5 \text{ mN/m}$  | $\beta = 0.76, Ca = 0.10,$<br>$G_s = 9.8, K_s = 205.8 \text{ mN/m}$  |
| 3            | $\beta = 0.64, Ca = 0.45,$<br>$G_s = 2.2, K_s = 45.7 \text{ mN/m}$ | $\beta = 0.66, Ca = 0.25,$<br>$G_s = 3.9, K_s = 82.3 \text{ mN/m}$  | $\beta = 0.64, Ca = 0.05,$<br>$G_s = 19.6, K_s = 411.6 \text{ mN/m}$ |
| 4            | $\beta = 0.55, Ca = 0.55,$<br>$G_s = 1.8, K_s = 37.4 \text{ mN/m}$ | $\beta = 0.56, Ca = 0.40,$<br>$G_s = 2.5, K_s = 51.5 \text{ mN/m}$  | $\beta = 0.50, Ca = 0.10,$<br>$G_s = 9.8, K_s = 205.8 \text{ mN/m}$  |
| 5            | $\beta = 0.48, Ca = 0.55,$<br>$G_s = 1.8, K_s = 37.4 \text{ mN/m}$ | $\beta = 0.42, Ca = 0.20,$<br>$G_s = 4.9, K_s = 102.9 \text{ mN/m}$ | $\beta = 0.45, Ca = 0.05,$<br>$G_s = 19.6, K_s = 411.6 \text{ mN/m}$ |

**Table S1** Best-fit parameters in numerical simulations for the (a) K-562 cells in Fig. 2a and (b) PC-3 cells in Fig. 2b.

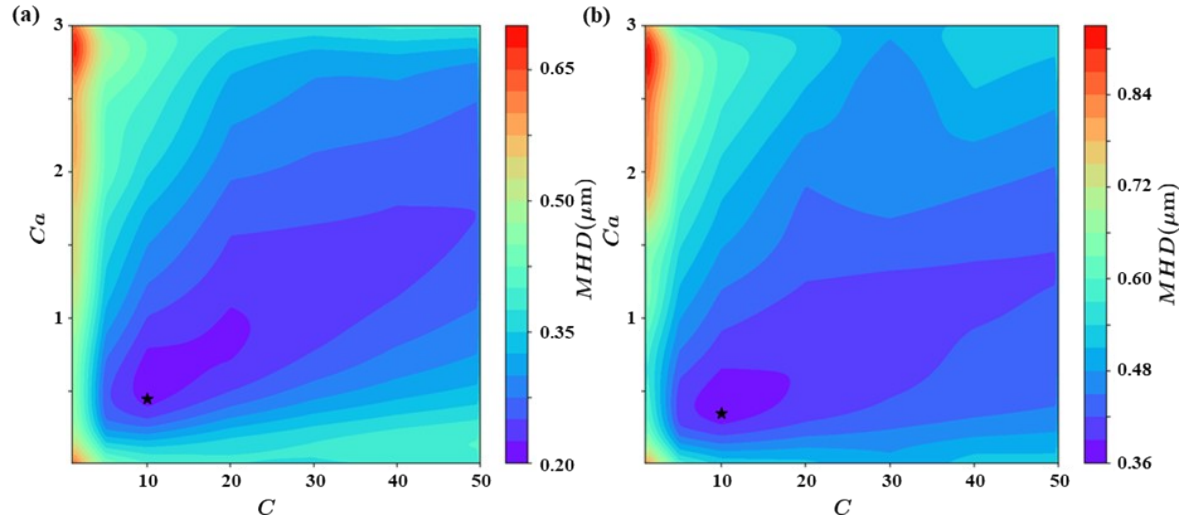

**Figure S1** Contour plots of the mean Hausdorff distance (MHD) between steady-deformed cell profiles obtained from numerical simulations and experiments for the (a) K-562 cell of Fig. 2c and (b) PC-3 cell of Fig. 2d. The two stars mark the locations of the minimum MHD, indicating the best fits.

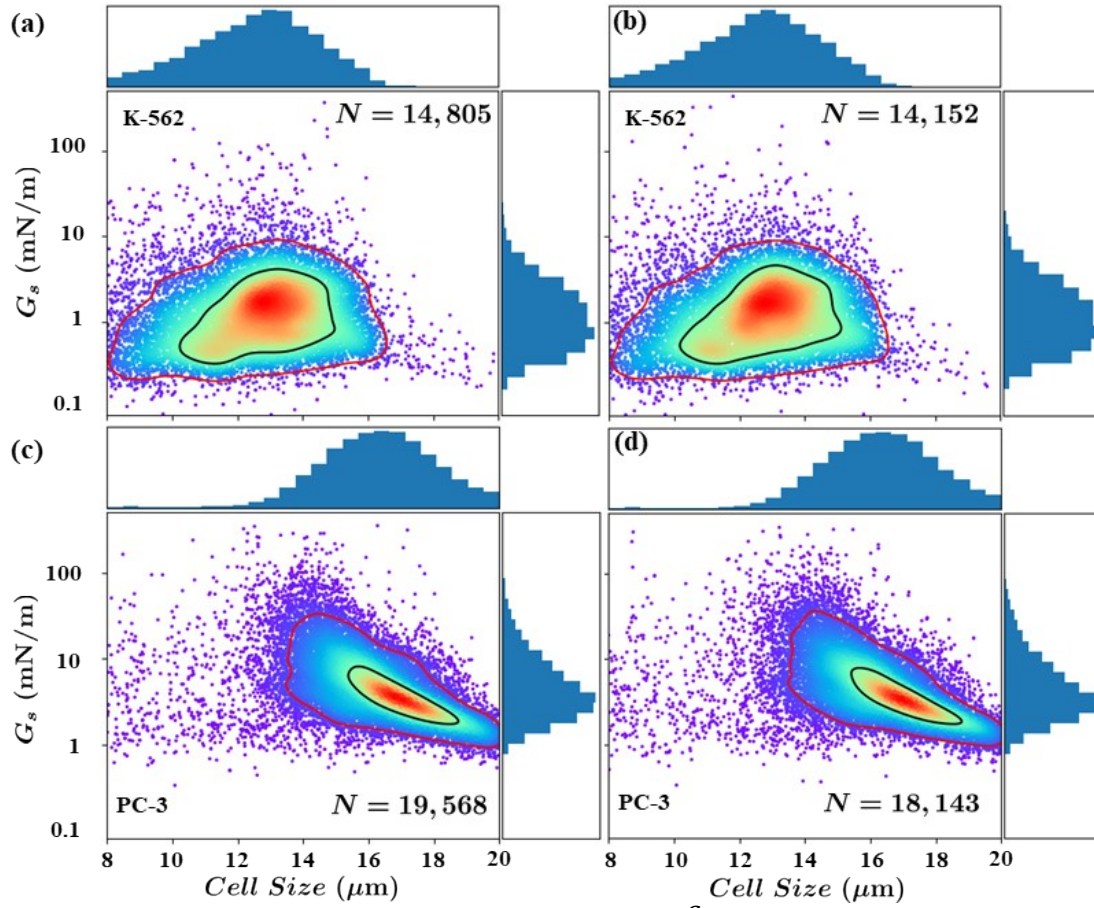

**Figure S2** Scatter plots of the surface shear elasticity  $G_s$  versus cell size of the (a, b) K-562 cells of Fig. 5a and (c, d) PC-3 cells of Fig. 5b. (a) & (c) are properties of cells measured in the first 2 minutes, and (c) & (d) are measured in the final 2 minutes of the experiments. The results show little time-dependent variations during the ~10-minute experiments.

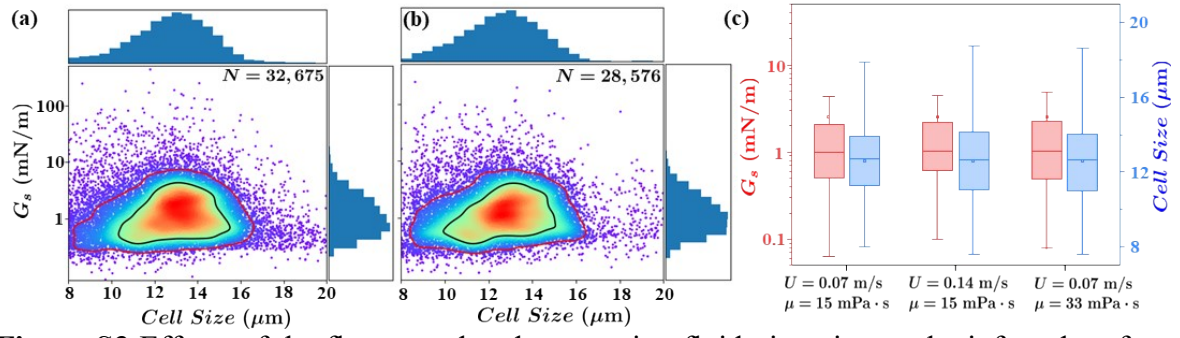

**Figure S3** Effects of the flow speed and suspension fluid viscosity on the inferred surface  $G_s$  of K-562 cells. Scatter plots of  $G_s$  versus size of (a) 32,765 K-562 cells suspended in PBS added with 2% methylcellulose flowing at a speed of 0.14 m/s, and (b) 28,576 K-562 cells suspended in PBS added with 3% methylcellulose flowing at 0.07 m/s. The result of the baseline experiment using the same batch of K-562 cells has been shown in Fig. 5a. (c) Box plots of the surface  $G_s$  and size of K-562 cells measured at the three different flow conditions.

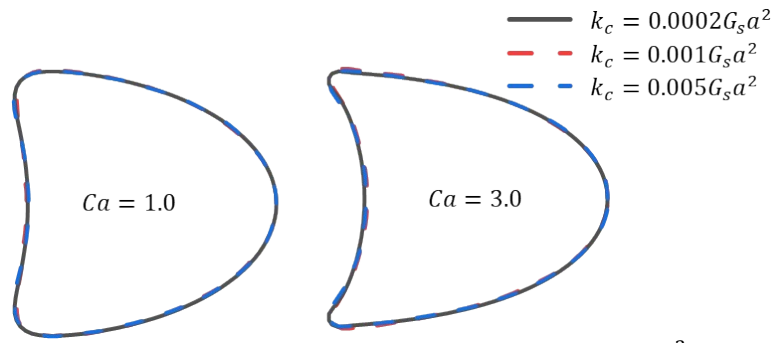

**Figure S4** Surface bending stiffness of the order of  $k_c \sim 0.001 G_s a^2$  has little effect on the steady deformation profile of a cell in a microchannel. The confinement ratio is  $\beta = 0.6$ . This observation is consistent with the results of Dupont et al. (C. Dupont, et al., *Phys. Fluids*, 2015, 27, 051902) about the influence of membrane bending on flow-induced deformation of microcapsules.
